# Supplementary material
Source: ML conference proceedings conference paper supplement (https://openaccess.thecvf.com/content/ACCV2024/html/Zhou_Joint_Image_Super-resolution_ACCV_2024_paper.html)
Supplement: Supplementary file 1 [file Zhou_Joint_Image_Super-resolution_ACCV_2024_supplemental.pdf]

# Supplementary Material of “Joint Image Super-resolution and Low-light Enhancement in the Dark”

Feihu Zhou<sup>1</sup>, Kan Chang<sup>1✉</sup>, Mingyang Ling<sup>2</sup>, Hengxin Li<sup>3</sup>, and Shucheng Xia<sup>1</sup>

<sup>1</sup> School of Computer and Electronic Information,  
Guangxi University, Nanning, China

`flyhu2@126.com, kanchang@gxu.edu.cn, xsc@st.gxu.edu.cn,`

<sup>2</sup> School of Electrical Engineering, Guangxi University, Nanning, China  
`lingmy@st.gxu.edu.cn`

<sup>3</sup> Shenzhen Xiaomi Communications Co.,Ltd, China  
`lihengxin@xiaomi.com`

In this document, we provide additional details about the DarkSR dataset, more visual comparisons on the DarkSR dataset, as well as the quantitative and qualitative results from training various methods for two specific camera models: the Canon EOS 450D and the Nikon D700.

## 1 More Details about the DarkSR Dataset

The DarkSR dataset comprises 20 models from four camera brands: *Canon*, *Sony*, *Nikon*, and *Leica*. Detailed information about the models and the corresponding number of training and testing images can be found in Table 1. The testing and training sets comprise 16 and 14 camera models, respectively. Note that to evaluate generalization, the testing set includes 32 images from 6 camera models not present in the training set.

## 2 More Visual Results Obtained on the DarkSR Dataset

Additional visual results are presented in Figs. 1, 2, 3 and 4. It is important to note that the camera models used in Figs. 1 and 2 are present in both the training and testing sets. However, the camera models used in Figs. 3 and 4 are not included in the training set.

It is obvious that our method produces images with fine details, suitable contrast and no color distortion. Furthermore, the results in Figs. 3 and 4 illustrate that our approach generalizes effectively to unseen camera models, aligning with the findings presented for the *Xiaomi* camera in the main paper.

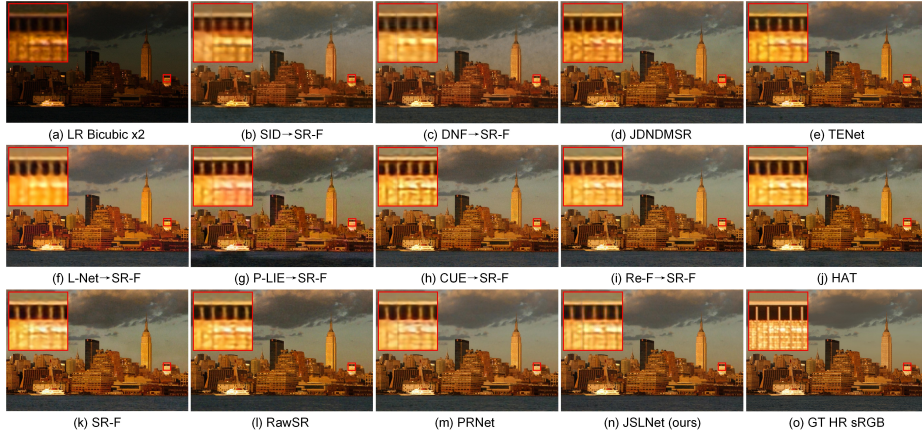

**Fig. 1:** Visual comparison of different methods on image *a3387*, zoom for best view.

**Table 1:** Detailed information of the DarkSR dataset.  $N_{\text{Test}}$  and  $N_{\text{Train}}$  denote the numbers of testing and training images, respectively.

| Camera Brand | Model Name        | $N_{\text{Test}}$ | $N_{\text{Train}}$ | Bayer Pattern |
|--------------|-------------------|-------------------|--------------------|---------------|
| <b>Canon</b> | EOS 5D            | 29                | 283                | RGGB          |
|              | EOS 10D           | 4                 | 30                 | RGGB          |
|              | EOS 20D           | 17                | 170                | RGGB          |
|              | EOS 30D           | 0                 | 29                 | RGGB          |
|              | EOS 40D           | 6                 | 103                | RGGB          |
|              | EOS D60           | 4                 | 0                  | RGGB          |
|              | EOS 300D          | 4                 | 54                 | RGGB          |
|              | EOS 350D          | 8                 | 0                  | RGGB          |
|              | EOS 400D          | 1                 | 31                 | RGGB          |
|              | EOS 450D          | 19                | 252                | RGGB          |
|              | 1D Mark II        | 14                | 141                | RGGB          |
|              | 1D Mark II N      | 3                 | 0                  | RGGB          |
|              | 1D Mark III       | 8                 | 0                  | RGGB          |
|              | PowerShot G9      | 0                 | 20                 | RGGB          |
| <b>SONY</b>  | DSLR-A900         | 10                | 26                 | RGGB          |
| <b>LEICA</b> | D-LUX 3           | 0                 | 24                 | RGGB          |
|              | M8 Digital Camera | 0                 | 12                 | RGGB          |
| <b>Nikon</b> | D200              | 3                 | 0                  | RGGB          |
|              | D300              | 6                 | 0                  | RGGB          |
|              | D700              | 17                | 220                | RGGB          |

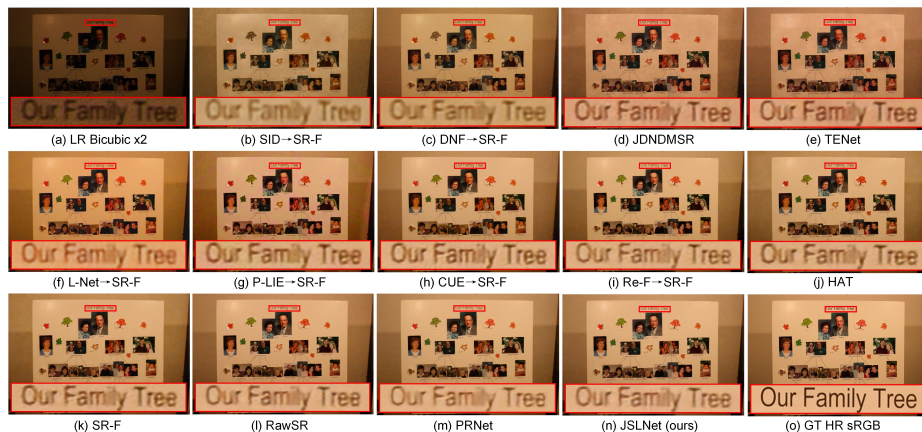

Fig. 2: Visual comparison of different methods on image *a1868*, zoom for best view.

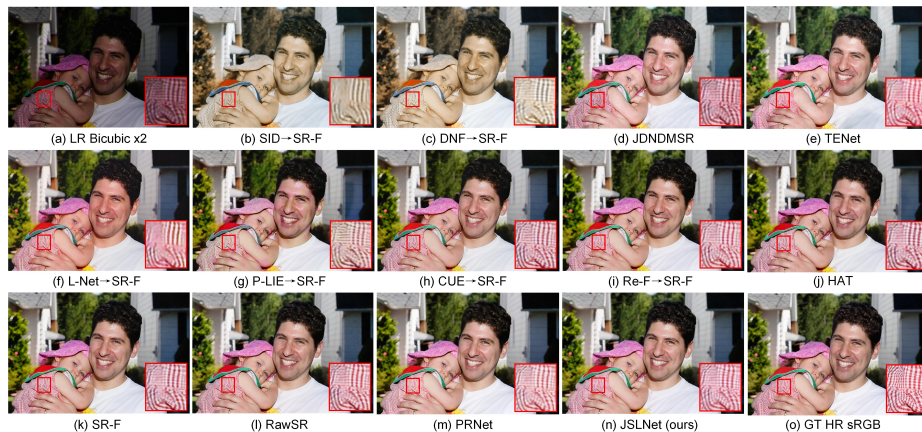

Fig. 3: Visual comparison of different methods on image *a0475*, zoom for best view.

### 3 Results of Training Separate CNN Models for Two Specific Camera models

Note that training JSLNet for each camera model is unnecessary, because JSLNet can learn ISP pipeline information from the sRGB input. In contrast, Raw-based methods are camera-specific and lack generalization. In this section, for each compared method, we provide the results of training separate CNN models for two specific camera models, Canon EOS 450D and Nikon D700, leveraging the larger number of training images available for these models in the DarkSR dataset. For each camera model, to avoid overfitting, we crop each training image into four sub-images, and then use the sub-images for training. All the other experimental settings are kept the same as that in the main paper.

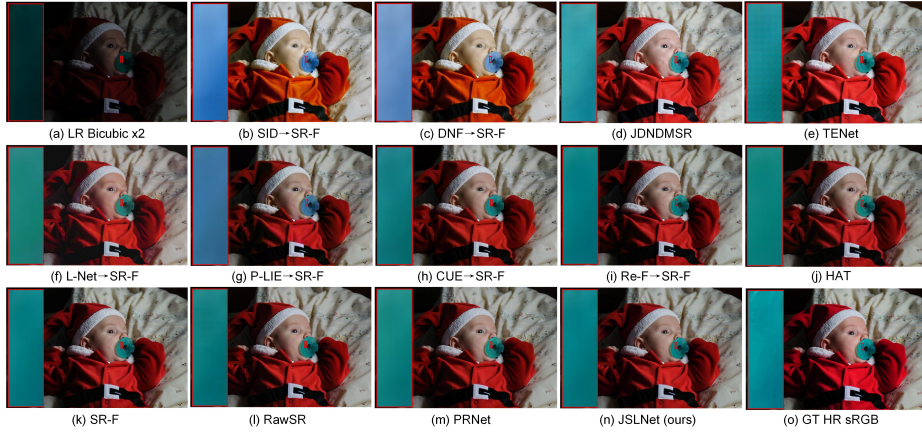

**Fig. 4:** Visual comparison of different methods on image *a3104*, zoom for best view.

**Table 2:** Quantitative results on two specific camera models in the DarkSR dataset. The best results are marked in **red**.

| Methods             | Input Type | Canon EOS 450D   |                 |                         | Nikon D700       |                 |                         |
|---------------------|------------|------------------|-----------------|-------------------------|------------------|-----------------|-------------------------|
|                     |            | CPSNR $\uparrow$ | SSIM $\uparrow$ | $\Delta E$ $\downarrow$ | CPSNR $\uparrow$ | SSIM $\uparrow$ | $\Delta E$ $\downarrow$ |
| DNF→SR-F            | RAW        | 20.846           | 0.7743          | 13.1976                 | 21.442           | 0.7648          | 11.8165                 |
| JDNMSR              | RAW        | 26.941           | 0.8476          | 8.1792                  | 22.868           | 0.8078          | 9.5585                  |
| Re-F→SR-F           | sRGB       | 30.274           | 0.8552          | 5.9878                  | 29.295           | 0.8570          | 6.2037                  |
| SRFormer            | sRGB       | 30.273           | 0.8553          | 5.8817                  | 29.391           | 0.8576          | 5.9402                  |
| PRNet               | Dual-input | 30.458           | <b>0.8621</b>   | 5.8750                  | 29.450           | 0.8639          | 5.8884                  |
| <b>JSLNet(ours)</b> | Dual-input | <b>30.558</b>    | 0.8560          | <b>5.8119</b>           | <b>29.652</b>    | <b>0.8662</b>   | <b>5.8385</b>           |

The quantitative results are shown in Table 2, and the visual comparisons can be found in Figs. 5 and 6, respectively. As shown, JSLNet consistently outperforms other methods across most metrics, demonstrating its superior performance. Furthermore, the visual results produced by JSLNet are remarkably close to the GT images. Despite retraining separate CNN models for each camera model, RAW-based methods still exhibit the poorest performance due to their lack of ISP pipeline information.



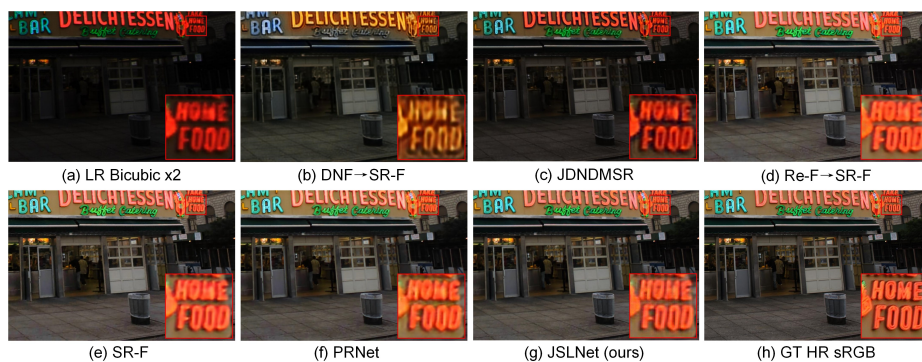

**Fig. 5:** Visual comparison of different methods on image *a1476* (camera model: Canon EOS 450D), zoom for best view.

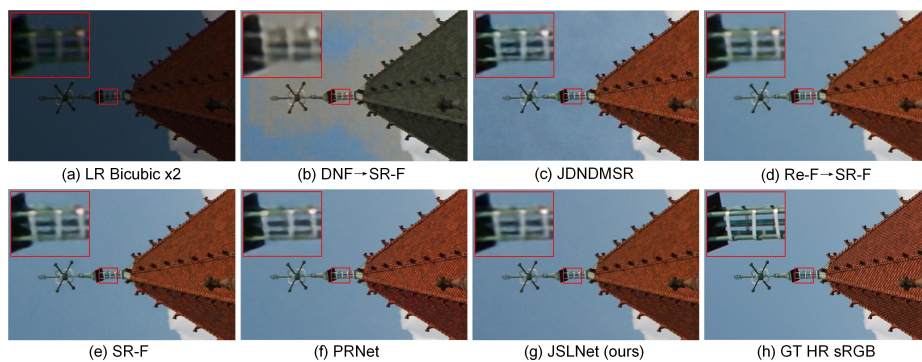

**Fig. 6:** Visual comparison of different methods on image *a4049* (camera model: Nikon D700), zoom for best view.
